# Supplementary material for: A two-tiered curriculum to improve data management practices for researchers
Source: PLoS One. 2019 May 1;14(5):e0215509. doi: 10.1371/journal.pone.0215509 (PMC6493725; doi:10.1371/journal.pone.0215509)
Supplement: S1 Data — (CSV) [file pone.0215509.s001.csv]

Module	How would you rank your understanding of X before you started the module	How would you rank your understanding of X now that you've taken this module	Was the level of material presented for this module:	Would you recommend this module to others?	Was the length of time allotted for this topic:	Was the material effectively presented
Module 1: The Story of Data	Moderate understanding	Strong understanding	Just right	Highly recommend	Just right	Very effectively presented
Module 1: The Story of Data	Moderate understanding	Moderate understanding	Just right	Recommend	Just right	Very effectively presented
Module 1: The Story of Data	Minimal understanding	Moderate understanding	Just right	Recommend	Just right	Mostly effectively presented
Module 1: The Story of Data	Moderate understanding	Moderate understanding	Too low	Recommend	Just right	Somewhat effectively presented
Module 1: The Story of Data	Moderate understanding	Moderate understanding	Just right	Recommend	Just right	Mostly effectively presented
Module 1: The Story of Data	Moderate understanding	Moderate understanding	Too low	Recommend	Just right	Mostly effectively presented
Module 1: The Story of Data	Moderate understanding	Strong understanding	Just right	Recommend	Too short	Very effectively presented
Module 1: The Story of Data	Moderate understanding	Moderate understanding	Just right	Recommend	Just right	Mostly effectively presented
Module 1: The Story of Data	Moderate understanding	Strong understanding	Just right	Recommend	Just right	Very effectively presented
Module 1: The Story of Data	Moderate understanding	Moderate understanding	Too low	Recommend with reservations	Too short	Very effectively presented
Module 1: The Story of Data	Strong understanding	Strong understanding	Just right	Recommend with reservations	Just right	Somewhat effectively presented
Module 1: The Story of Data	Moderate understanding	Moderate understanding	Just right	Recommend	Too short	Mostly effectively presented
Module 1: The Story of Data	Moderate understanding	Moderate understanding	Just right	Highly recommend	Just right	Very effectively presented
Module 1: The Story of Data	No understanding	Minimal understanding	Just right	Recommend	Just right	Mostly effectively presented
Module 1: The Story of Data	Moderate understanding	Strong understanding	Just right	Recommend	Just right	Very effectively presented
Module 1: The Story of Data	Minimal understanding	Moderate understanding	Just right	Recommend	Just right	Mostly effectively presented
Module 1: The Story of Data	Strong understanding	Strong understanding	Too low	Recommend	Just right	Mostly effectively presented
Module 1: The Story of Data	Strong understanding	Strong understanding	Too low	Recommend	Just right	Mostly effectively presented
Module 1: The Story of Data	Moderate understanding	Moderate understanding	Just right	Recommend	Just right	Mostly effectively presented
Module 1: The Story of Data	Moderate understanding	Moderate understanding	Just right	Recommend	Just right	Very effectively presented
Module 1: The Story of Data	Minimal understanding	Moderate understanding	Just right	Highly recommend	Just right	Very effectively presented
Module 1: The Story of Data	Moderate understanding	Moderate understanding	Just right	Recommend	Just right	Mostly effectively presented
Module 1: The Story of Data	Moderate understanding	Moderate understanding	Too low	Recommend with reservations	Just right	Mostly effectively presented
Module 1: The Story of Data	Moderate understanding	Moderate understanding	Just right	Recommend	Just right	Mostly effectively presented
Module 1: The Story of Data	Moderate understanding	Moderate understanding	Too low	Recommend	Just right	Mostly effectively presented
Module 1: The Story of Data	Moderate understanding	Moderate understanding	Just right	Highly recommend	Just right	Very effectively presented
Module 1: The Story of Data	Minimal understanding	Moderate understanding	Just right	Recommend	Too short	Very effectively presented
Module 1: The Story of Data	Minimal understanding	Moderate understanding	Just right	Recommend	Just right	Mostly effectively presented
Module 1: The Story of Data	Moderate understanding	Moderate understanding	Just right	Recommend	Just right	Mostly effectively presented
Module 1: The Story of Data	Minimal understanding	Moderate understanding	Just right	Recommend with reservations	Just right	Somewhat effectively presented
Module 1: The Story of Data	Moderate understanding	Strong understanding	Just right	Recommend	Just right	Very effectively presented
Module 1: The Story of Data	Minimal understanding	Minimal understanding	Just right	Recommend	Just right	Somewhat effectively presented
Module 1: The Story of Data	Minimal understanding	Moderate understanding	Just right	Recommend with reservations	Just right	Mostly effectively presented
Module 1: The Story of Data	Strong understanding	Strong understanding	Just right	Recommend	Just right	Mostly effectively presented
Module 1: The Story of Data	Moderate understanding	Moderate understanding	Just right	Recommend	Just right	Very effectively presented
Module 1: The Story of Data	Moderate understanding	Moderate understanding	Just right	Recommend	Just right	Very effectively presented
Module 1: The Story of Data	Minimal understanding	Moderate understanding	Just right	Highly recommend	Too short	Very effectively presented
Module 1: The Story of Data	Minimal understanding	Moderate understanding	Just right	Highly recommend	Just right	Very effectively presented
Module 1: The Story of Data	Moderate understanding	Moderate understanding	Just right	Recommend	Just right	Very effectively presented
Module 1: The Story of Data	Strong understanding	Strong understanding	Just right	Highly recommend	Just right	Very effectively presented
Module 1: The Story of Data	Moderate understanding	Strong understanding	Just right	Recommend	Just right	Very effectively presented
Module 1: The Story of Data	Moderate understanding	Moderate understanding	Just right	Recommend	Just right	Mostly effectively presented
Module 1: The Story of Data	Minimal understanding	Minimal understanding	Just right	Recommend	Just right	Very effectively presented
Module 1: The Story of Data	Minimal understanding	Moderate understanding	Just right	Recommend	Just right	Mostly effectively presented
Module 1: The Story of Data	Minimal understanding	Moderate understanding	Just right	Recommend with reservations	Too short	Somewhat effectively presented
Module 1: The Story of Data	Minimal understanding	Moderate understanding	Just right	Highly recommend	Just right	Very effectively presented
Module 1: The Story of Data	Moderate understanding	Strong understanding	Just right	Recommend	Just right	Very effectively presented
Module 1: The Story of Data	Minimal understanding	Strong understanding	Just right	Recommend	Just right	Mostly effectively presented
Module 1: The Story of Data	Moderate understanding	Moderate understanding	Too low	Recommend with reservations	Just right	Mostly effectively presented
Module 1: The Story of Data	Minimal understanding	Moderate understanding	Just right	Recommend	Just right	Mostly effectively presented
Module 1: The Story of Data	Strong understanding	Strong understanding	Just right	Highly recommend	Just right	Very effectively presented
Module 1: The Story of Data	Strong understanding	Strong understanding	Just right	Recommend	Just right	Mostly effectively presented
Module 1: The Story of Data	Moderate understanding	Moderate understanding	Just right	Recommend with reservations	Just right	Mostly effectively presented
Module 1: The Story of Data	Moderate understanding	Moderate understanding	Just right	Recommend	Just right	Mostly effectively presented
Module 1: The Story of Data	Strong understanding	Strong understanding	Just right	Recommend with reservations	Just right	Mostly effectively presented
Module 1: The Story of Data	Minimal understanding	Minimal understanding	Just right	Recommend	Just right	Very effectively presented
Module 1: The Story of Data	Minimal understanding	Moderate understanding	Just right	Highly recommend	Just right	Very effectively presented
Module 1: The Story of Data	Strong understanding	Strong understanding	Too low	Recommend with reservations	Too short	Somewhat effectively presented
Module 1: The Story of Data	Moderate understanding	Strong understanding	Just right	Recommend	Just right	Very effectively presented
Module 1: The Story of Data	Minimal understanding	Minimal understanding	Just right	Recommend with reservations	Just right	Mostly effectively presented
Module 1: The Story of Data	Strong understanding	Strong understanding	Just right	Recommend	Just right	Mostly effectively presented
Module 1: The Story of Data	Minimal understanding	Moderate understanding	Just right	Recommend	Too short	Mostly effectively presented
Module 1: The Story of Data	Moderate understanding	Strong understanding	Just right	Recommend	Just right	Very effectively presented
Module 2: The Data Lifecycle	Moderate understanding	Strong understanding	Just right	Highly recommend	Just right	Very effectively presented
Module 2: The Data Lifecycle	Minimal understanding	Moderate understanding	Just right	Highly recommend	Just right	Very effectively presented
Module 2: The Data Lifecycle	Moderate understanding	Strong understanding	Just right	Highly recommend	Just right	Very effectively presented
Module 2: The Data Lifecycle	Moderate understanding	Moderate understanding	Just right	Recommend	Just right	Mostly effectively presented
Module 2: The Data Lifecycle	Moderate understanding	Moderate understanding	Just right	Recommend	Just right	Mostly effectively presented
Module 2: The Data Lifecycle	Moderate understanding	Moderate understanding	Just right	Recommend	Just right	Mostly effectively presented
Module 2: The Data Lifecycle	Moderate understanding	Strong understanding	Just right	Highly recommend	Just right	Very effectively presented
Module 2: The Data Lifecycle	Strong understanding	Strong understanding	Just right	Recommend	Just right	Very effectively presented
Module 2: The Data Lifecycle	Minimal understanding	Strong understanding	Just right	Recommend	Just right	Very effectively presented
Module 2: The Data Lifecycle	Strong understanding	Strong understanding	Just right	Highly recommend	Just right	Very effectively presented
Module 2: The Data Lifecycle	Moderate understanding	Moderate understanding	Just right	Highly recommend	Just right	Very effectively presented
Module 2: The Data Lifecycle	Strong understanding	Strong understanding	Just right	Highly recommend	Just right	Very effectively presented
Module 2: The Data Lifecycle	Moderate understanding	Strong understanding	Just right	Recommend	Just right	Mostly effectively presented
Module 2: The Data Lifecycle	Strong understanding	Strong understanding	Too low	Highly recommend	Just right	Very effectively presented
Module 2: The Data Lifecycle	Moderate understanding	Strong understanding	Just right	Recommend	Just right	Very effectively presented
Module 2: The Data Lifecycle	Minimal understanding	Strong understanding	Just right	Recommend	Just right	Mostly effectively presented
Module 2: The Data Lifecycle	Minimal understanding	Moderate understanding	Just right	Recommend	Just right	Mostly effectively presented
Module 2: The Data Lifecycle	Minimal understanding	Moderate understanding	Just right	Highly recommend	Just right	Very effectively presented
Module 2: The Data Lifecycle	Minimal understanding	Moderate understanding	Just right	Highly recommend	Just right	Very effectively presented
Module 2: The Data Lifecycle	Moderate understanding	Moderate understanding	Just right	Recommend	Just right	Very effectively presented
Module 2: The Data Lifecycle	Moderate understanding	Strong understanding	Just right	Highly recommend	Just right	Very effectively presented
Module 2: The Data Lifecycle	Moderate understanding	Strong understanding	Just right	Recommend	Just right	Very effectively presented
Module 2: The Data Lifecycle	Minimal understanding	Moderate understanding	Just right	Highly recommend	Just right	Very effectively presented
Module 2: The Data Lifecycle	Minimal understanding	Minimal understanding	Just right	Highly recommend	Just right	Very effectively presented
Module 2: The Data Lifecycle	Minimal understanding	Moderate understanding	Just right	Recommend	Just right	Mostly effectively presented
Module 2: The Data Lifecycle	Minimal understanding	Moderate understanding	Just right	Recommend	Just right	Somewhat effectively presented
Module 2: The Data Lifecycle	Minimal understanding	Moderate understanding	Just right	Recommend	Just right	Mostly effectively presented
Module 2: The Data Lifecycle	Moderate understanding	Moderate understanding	Just right	Recommend	Just right	Mostly effectively presented
Module 2: The Data Lifecycle	Moderate understanding	Strong understanding	Just right	Recommend	Just right	Mostly effectively presented
Module 2: The Data Lifecycle	Moderate understanding	Strong understanding	Just right	Recommend	Just right	Mostly effectively presented
Module 2: The Data Lifecycle	Moderate understanding	Strong understanding	Just right	Recommend	Just right	Mostly effectively presented
Module 2: The Data Lifecycle	Strong understanding	Strong understanding	Just right	Recommend	Just right	Mostly effectively presented
Module 2: The Data Lifecycle	Strong understanding	Strong understanding	Just right	Recommend	Just right	Mostly effectively presented
Module 2: The Data Lifecycle	Strong understanding	Strong understanding	Just right	Recommend	Just right	Mostly effectively presented
Module 2: The Data Lifecycle	Moderate understanding	Moderate understanding	Just right	Recommend	Just right	Very effectively presented
Module 2: The Data Lifecycle	Minimal understanding	Moderate understanding	Just right	Highly recommend	Too short	Very effectively presented
Module 2: The Data Lifecycle	Minimal understanding	Moderate understanding	Just right	Recommend	Just right	Mostly effectively presented
Module 2: The Data Lifecycle	Moderate understanding	Moderate understanding	Just right	Recommend	Just right	Mostly effectively presented
Module 2: The Data Lifecycle	Moderate understanding	Moderate understanding	Just right	Recommend with reservations	Just right	Somewhat effectively presented
Module 2: The Data Lifecycle	Minimal understanding	Moderate understanding	Too advanced	Recommend	Just right	Mostly effectively presented
Module 2: The Data Lifecycle	Strong understanding	Strong understanding	Just right	Highly recommend	Just right	Very effectively presented
Module 2: The Data Lifecycle	No understanding	Minimal understanding	Just right	Recommend	Just right	Somewhat effectively presented
Module 2: The Data Lifecycle	Moderate understanding	Strong understanding	Just right	Highly recommend	Just right	Very effectively presented
Module 2: The Data Lifecycle	Moderate understanding	Moderate understanding	Just right	Recommend	Too long	Mostly effectively presented
Module 2: The Data Lifecycle	Moderate understanding	Moderate understanding	Just right	Recommend with reservations	Just right	Somewhat effectively presented
Module 2: The Data Lifecycle	Minimal understanding	Moderate understanding	Too low	Recommend with reservations	Just right	Mostly effectively presented
Module 2: The Data Lifecycle	Minimal understanding	Moderate understanding	Just right	Recommend	Just right	Mostly effectively presented
Module 2: The Data Lifecycle	Strong understanding	Strong understanding	Just right	Recommend	Just right	Mostly effectively presented
Module 2: The Data Lifecycle	Strong understanding	Strong understanding	Just right	Highly recommend	Just right	Very effectively presented
Module 2: The Data Lifecycle	Moderate understanding	Strong understanding	Just right	Recommend	Just right	Mostly effectively presented
Module 2: The Data Lifecycle	Moderate understanding	Moderate understanding	Just right	Highly recommend	Just right	Mostly effectively presented
Module 2: The Data Lifecycle	Moderate understanding	Strong understanding	Just right	Recommend	Just right	Mostly effectively presented
Module 2: The Data Lifecycle	Moderate understanding	Moderate understanding	Just right	Recommend	Just right	Very effectively presented
Module 2: The Data Lifecycle	Strong understanding	Strong understanding	Just right	Recommend	Just right	Mostly effectively presented
Module 2: The Data Lifecycle	Strong understanding	Strong understanding	Just right	Highly recommend	Just right	Very effectively presented
Module 3: Understanding Researchers	Minimal understanding	Strong understanding	Just right	Highly recommend	Just right	Very effectively presented
Module 3: Understanding Researchers	Minimal understanding	Moderate understanding	Just right	Highly recommend	Just right	Very effectively presented
Module 3: Understanding Researchers	Moderate understanding	Strong understanding	Just right	Highly recommend	Just right	Very effectively presented
Module 3: Understanding Researchers	Moderate understanding	Strong understanding	Just right	Highly recommend	Just right	Very effectively presented
Module 3: Understanding Researchers	Moderate understanding	Moderate understanding	Just right	Recommend	Just right	Mostly effectively presented
Module 3: Understanding Researchers	Moderate understanding	Moderate understanding	Too low	Recommend	Just right	Mostly effectively presented
Module 3: Understanding Researchers	Moderate understanding	Moderate understanding	Just right	Highly recommend	Just right	Very effectively presented
Module 3: Understanding Researchers	Moderate understanding	Moderate understanding	Just right	Highly recommend	Just right	Very effectively presented
Module 3: Understanding Researchers	Moderate understanding	Moderate understanding	Just right	Highly recommend	Just right	Very effectively presented
Module 3: Understanding Researchers	Minimal understanding	Moderate understanding	Just right	Recommend	Just right	Very effectively presented
Module 3: Understanding Researchers	Minimal understanding	Moderate understanding	Just right	Highly recommend	Just right	Very effectively presented
Module 3: Understanding Researchers	Moderate understanding	Moderate understanding	Just right	Recommend	Just right	Mostly effectively presented
Module 3: Understanding Researchers	Minimal understanding	Moderate understanding	Just right	Recommend	Just right	Very effectively presented
Module 3: Understanding Researchers	Minimal understanding	Moderate understanding	Just right	Recommend	Just right	Very effectively presented
Module 3: Understanding Researchers	Minimal understanding	Moderate understanding	Just right	Highly recommend	Just right	Very effectively presented
Module 3: Understanding Researchers	Moderate understanding	Strong understanding	Just right	Recommend	Just right	Very effectively presented
Module 3: Understanding Researchers	Minimal understanding	Moderate understanding	Just right	Highly recommend	Just right	Very effectively presented
Module 3: Understanding Researchers	Minimal understanding	Moderate understanding	Just right	Recommend	Just right	Very effectively presented
Module 3: Understanding Researchers	Minimal understanding	Moderate understanding	Just right	Highly recommend	Just right	Very effectively presented
Module 3: Understanding Researchers	Minimal understanding	Moderate understanding	Just right	Highly recommend	Just right	Mostly effectively presented
Module 3: Understanding Researchers	Moderate understanding	Strong understanding	Just right	Recommend	Just right	Mostly effectively presented
Module 3: Understanding Researchers	Strong understanding	Strong understanding	Just right	Recommend	Just right	Mostly effectively presented
Module 3: Understanding Researchers	Moderate understanding	Strong understanding	Just right	Highly recommend	Just right	Very effectively presented
Module 3: Understanding Researchers	Moderate understanding	Moderate understanding	Just right	Recommend	Just right	Mostly effectively presented
Module 3: Understanding Researchers	Strong understanding	Moderate understanding	Just right	Recommend	Just right	Mostly effectively presented
Module 3: Understanding Researchers	Minimal understanding	Moderate understanding	Just right	Recommend	Just right	Very effectively presented
Module 3: Understanding Researchers	Minimal understanding	Moderate understanding	Just right	Highly recommend	Too short	Very effectively presented
Module 3: Understanding Researchers	Minimal understanding	Strong understanding	Just right	Recommend	Just right	Very effectively presented
Module 3: Understanding Researchers	Moderate understanding	Strong understanding	Just right	Recommend	Just right	Mostly effectively presented
Module 3: Understanding Researchers	Moderate understanding	Strong understanding	Just right	Highly recommend	Just right	Mostly effectively presented
Module 3: Understanding Researchers	Minimal understanding	Minimal understanding	Too advanced	Not recommend	Just right	Somewhat effectively presented
Module 3: Understanding Researchers	Moderate understanding	Strong understanding	Just right	Highly recommend	Just right	Very effectively presented
Module 3: Understanding Researchers	Moderate understanding	Moderate understanding	Just right	Highly recommend	Just right	Very effectively presented
Module 3: Understanding Researchers	Moderate understanding	Moderate understanding	Just right	Recommend	Just right	Mostly effectively presented
Module 3: Understanding Researchers	Minimal understanding	Moderate understanding	Just right	Recommend	Just right	Mostly effectively presented
Module 3: Understanding Researchers	Minimal understanding	Moderate understanding	Just right	Recommend	Just right	Mostly effectively presented
Module 3: Understanding Researchers	Moderate understanding	Strong understanding	Just right	Highly recommend	Just right	Very effectively presented
Module 3: Understanding Researchers	Minimal understanding	Moderate understanding	Just right	Recommend	Just right	Mostly effectively presented
Module 3: Understanding Researchers	Moderate understanding	Strong understanding	Just right	Highly recommend	Just right	Very effectively presented
Module 3: Understanding Researchers	Moderate understanding	Moderate understanding	Just right	Recommend with reservations	Just right	Somewhat effectively presented
Module 3: Understanding Researchers	Moderate understanding	Strong understanding	Just right	Recommend with reservations	Just right	Mostly effectively presented
Module 3: Understanding Researchers	Minimal understanding	Moderate understanding	Just right	Highly recommend	Just right	Very effectively presented
Module 4: RDM Climate	Moderate understanding	Strong understanding	Just right	Highly recommend	Just right	Very effectively presented
Module 4: RDM Climate	Moderate understanding	Moderate understanding	Just right	Highly recommend	Just right	Very effectively presented
Module 4: RDM Climate	Moderate understanding	Strong understanding	Just right	Highly recommend	Just right	Very effectively presented
Module 4: RDM Climate	Moderate understanding	Moderate understanding	Just right	Recommend	Just right	Mostly effectively presented
Module 4: RDM Climate	Moderate understanding	Moderate understanding	Just right	Recommend	Just right	Mostly effectively presented
Module 4: RDM Climate	Moderate understanding	Moderate understanding	Just right	Highly recommend	Just right	Mostly effectively presented
Module 4: RDM Climate	Moderate understanding	Moderate understanding	Just right	Highly recommend	Just right	Very effectively presented
Module 4: RDM Climate	No understanding	Minimal understanding	Just right	Recommend	Just right	Somewhat effectively presented
Module 4: RDM Climate	Minimal understanding	Moderate understanding	Just right	Highly recommend	Just right	Mostly effectively presented
Module 4: RDM Climate	Minimal understanding	Moderate understanding	Just right	Recommend	Just right	Very effectively presented
Module 4: RDM Climate	Minimal understanding	Moderate understanding	Just right	Recommend	Just right	Very effectively presented
Module 4: RDM Climate	No understanding	Minimal understanding	Just right	Highly recommend	Just right	Mostly effectively presented
Module 4: RDM Climate	Minimal understanding	Moderate understanding	Just right	Recommend	Just right	Very effectively presented
Module 4: RDM Climate	Minimal understanding	Moderate understanding	Just right	Highly recommend	Just right	Very effectively presented
Module 4: RDM Climate	Minimal understanding	Moderate understanding	Just right	Highly recommend	Just right	Mostly effectively presented
Module 4: RDM Climate	Minimal understanding	Moderate understanding	Too much	Recommend	Just right	Mostly effectively presented
Module 4: RDM Climate	Moderate understanding	Moderate understanding	Too much	Recommend	Just right	Mostly effectively presented
Module 4: RDM Climate	Minimal understanding	Moderate understanding	Just right	Recommend	Just right	Very effectively presented
Module 4: RDM Climate	Minimal understanding	Moderate understanding	Just right	Highly recommend	Just right	Very effectively presented
Module 4: RDM Climate	Minimal understanding	Moderate understanding	Just right	Recommend	Just right	Very effectively presented
Module 4: RDM Climate	Minimal understanding	Moderate understanding	Just right	Highly recommend	Just right	Very effectively presented
Module 4: RDM Climate	Strong understanding	Strong understanding	Just right	Highly recommend	Just right	Very effectively presented
Module 4: RDM Climate	Moderate understanding	Moderate understanding	Just right	Recommend with reservations	Just right	Somewhat effectively presented
Module 4: RDM Climate	Moderate understanding	Moderate understanding	Just right	Highly recommend	Just right	Very effectively presented
Module 4: RDM Climate	Moderate understanding	Moderate understanding	Too much	Recommend	Just right	Somewhat effectively presented
Module 4: RDM Climate	Minimal understanding	Minimal understanding	Too low	Recommend with reservations	Too short	Mostly effectively presented
Module 4: RDM Climate	Minimal understanding	Moderate understanding	Just right	Recommend	Just right	Mostly effectively presented
Module 4: RDM Climate	Moderate understanding	Strong understanding	Just right	Highly recommend	Just right	Very effectively presented
Module 4: RDM Climate	Moderate understanding	Moderate understanding	Just right	Recommend with reservations	Just right	Mostly effectively presented
Module 4: RDM Climate	Moderate understanding	Moderate understanding	Too low	Recommend	Too short	Mostly effectively presented
Module 4: RDM Climate	Moderate understanding	Strong understanding	Just right	Recommend	Just right	Very effectively presented
Module 4: RDM Climate	Strong understanding	Strong understanding	Just right	Recommend with reservations	Just right	Somewhat effectively presented
Module 4: RDM Climate	Moderate understanding	Moderate understanding	Just right	Highly recommend	Just right	Mostly effectively presented
Module 5: Data Documentation Best Practices	Minimal understanding	Strong understanding	Just right	Highly recommend	Just right	Very effectively presented
Module 5: Data Documentation Best Practices	Minimal understanding	Moderate understanding	Just right	Highly recommend	Just right	Very effectively presented
Module 5: Data Documentation Best Practices	Moderate understanding	Strong understanding	Just right	Highly recommend	Just right	Very effectively presented
Module 5: Data Documentation Best Practices	Moderate understanding	Strong understanding	Just right	Highly recommend	Just right	Very effectively presented
Module 5: Data Documentation Best Practices	Moderate understanding	Moderate understanding	Just right	Recommend with reservations	Just right	Mostly effectively presented
Module 5: Data Documentation Best Practices	Moderate understanding	Strong understanding	Just right	Highly recommend	Just right	Very effectively presented
Module 5: Data Documentation Best Practices	Moderate understanding	Moderate understanding	Just right	Highly recommend	Just right	Very effectively presented
Module 5: Data Documentation Best Practices	Minimal understanding	Moderate understanding	Just right	Highly recommend	Just right	Mostly effectively presented
Module 5: Data Documentation Best Practices	Minimal understanding	Moderate understanding	Just right	Highly recommend	Just right	Very effectively presented
Module 5: Data Documentation Best Practices	No understanding	Minimal understanding	Just right	Highly recommend	Just right	Very effectively presented
Module 5: Data Documentation Best Practices	Minimal understanding	Moderate understanding	Just right	Recommend	Just right	Mostly effectively presented
Module 5: Data Documentation Best Practices	Minimal understanding	Moderate understanding	Just right	Recommend	Just right	Mostly effectively presented
Module 5: Data Documentation Best Practices	Minimal understanding	Moderate understanding	Just right	Recommend	Just right	Mostly effectively presented
Module 5: Data Documentation Best Practices	Strong understanding	Strong understanding	Just right	Highly recommend	Just right	Very effectively presented
Module 5: Data Documentation Best Practices	Moderate understanding	Moderate understanding	Just right	Recommend	Just right	Mostly effectively presented
Module 5: Data Documentation Best Practices	Minimal understanding	Moderate understanding	Just right	Recommend	Just right	Very effectively presented
Module 5: Data Documentation Best Practices	Minimal understanding	Moderate understanding	Just right	Highly recommend	Just right	Very effectively presented
Module 5: Data Documentation Best Practices	Minimal understanding	Strong understanding	Just right	Recommend	Just right	Mostly effectively presented
Module 5: Data Documentation Best Practices	Minimal understanding	Moderate understanding	Just right	Recommend	Just right	Mostly effectively presented
Module 5: Data Documentation Best Practices	Strong understanding	Strong understanding	Just right	Recommend	Just right	Mostly effectively presented
Module 5: Data Documentation Best Practices	Minimal understanding	Moderate understanding	Just right	Recommend	Just right	Very effectively presented
Module 5: Data Documentation Best Practices	Minimal understanding	Moderate understanding	Just right	Highly recommend	Just right	Very effectively presented
Module 5: Data Documentation Best Practices	Moderate understanding	Moderate understanding	Just right	Recommend	Too long	Somewhat effectively presented
Module 5: Data Documentation Best Practices	Moderate understanding	Moderate understanding	Too low	Recommend with reservations	Too short	Somewhat effectively presented
Module 5: Data Documentation Best Practices	Minimal understanding	Moderate understanding	Just right	Recommend	Just right	Somewhat effectively presented
Module 5: Data Documentation Best Practices	Strong understanding	Strong understanding	Just right	Highly recommend	Just right	Very effectively presented
Module 5: Data Documentation Best Practices	Moderate understanding	Moderate understanding	Just right	Recommend	Just right	Mostly effectively presented
Module 5: Data Documentation Best Practices	Moderate understanding	Strong understanding	Just right	Highly recommend	Just right	Very effectively presented
Module 5: Data Documentation Best Practices	Strong understanding	Strong understanding	Just right	Recommend with reservations	Just right	Mostly effectively presented
Module 5: Data Documentation Best Practices	Moderate understanding	Strong understanding	Just right	Highly recommend	Just right	Very effectively presented
Module 6: Data Standards	Minimal understanding	Strong understanding	Just right	Highly recommend	Too short	Mostly effectively presented
Module 6: Data Standards	Minimal understanding	Moderate understanding	Just right	Highly recommend	Just right	Very effectively presented
Module 6: Data Standards	Moderate understanding	Strong understanding	Just right	Highly recommend	Just right	Very effectively presented
Module 6: Data Standards	Moderate understanding	Moderate understanding	Just right	Recommend	Just right	Very effectively presented
Module 6: Data Standards	Moderate understanding	Moderate understanding	Just right	Recommend	Just right	Mostly effectively presented
Module 6: Data Standards	Minimal understanding	Moderate understanding	Just right	Recommend	Too short	Mostly effectively presented
Module 6: Data Standards	Moderate understanding	Moderate understanding	Just right	Highly recommend	Just right	Very effectively presented
Module 6: Data Standards	Minimal understanding	Moderate understanding	Just right	Recommend	Too short	Mostly effectively presented
Module 6: Data Standards	Minimal understanding	Moderate understanding	Just right	Recommend	Too short	Very effectively presented
Module 6: Data Standards	Minimal understanding	Moderate understanding	Just right	Highly recommend	Just right	Mostly effectively presented
Module 6: Data Standards	Minimal understanding	Moderate understanding	Just right	Recommend	Just right	Very effectively presented
Module 6: Data Standards	No understanding	Minimal understanding	Just right	Highly recommend	Just right	Mostly effectively presented
Module 6: Data Standards	Minimal understanding	Moderate understanding	Too advanced	Recommend	Too short	Somewhat effectively presented
Module 6: Data Standards	Moderate understanding	Strong understanding	Just right	Recommend	Just right	Mostly effectively presented
Module 6: Data Standards	Minimal understanding	Minimal understanding	Just right	Recommend with reservations	Just right	Mostly effectively presented
Module 6: Data Standards	Minimal understanding	Moderate understanding	Just right	Highly recommend	Just right	Very effectively presented
Module 6: Data Standards	Minimal understanding	Moderate understanding	Just right	Recommend	Too short	Mostly effectively presented
Module 6: Data Standards	Minimal understanding	Moderate understanding	Just right	Recommend	Just right	Mostly effectively presented
Module 6: Data Standards	Strong understanding	Strong understanding	Just right	Highly recommend	Just right	Very effectively presented
Module 6: Data Standards	Moderate understanding	Moderate understanding	Just right	Recommend	Just right	Mostly effectively presented
Module 6: Data Standards	Minimal understanding	Moderate understanding	Just right	Recommend	Just right	Somewhat effectively presented
Module 6: Data Standards	Minimal understanding	Moderate understanding	Just right	Recommend	Just right	Mostly effectively presented
Module 6: Data Standards	Minimal understanding	Moderate understanding	Too low	Recommend with reservations	Too short	Somewhat effectively presented
Module 6: Data Standards	Moderate understanding	Moderate understanding	Just right	Recommend with reservations	Just right	Somewhat effectively presented
Module 6: Data Standards	Strong understanding	Strong understanding	Just right	Highly recommend	Just right	Very effectively presented
Module 6: Data Standards	Moderate understanding	Moderate understanding	Just right	Recommend	Just right	Mostly effectively presented
Module 6: Data Standards	Minimal understanding	Strong understanding	Just right	Highly recommend	Just right	Mostly effectively presented
Module 6: Data Standards	Moderate understanding	Strong understanding	Just right	Recommend	Just right	Mostly effectively presented
Module 6: Data Standards	Moderate understanding	Strong understanding	Just right	Highly recommend	Just right	Very effectively presented
Module 7: Storage, Preservation, and Sharing	Moderate understanding	Strong understanding	Just right	Highly recommend	Just right	Very effectively presented
Module 7: Storage, Preservation, and Sharing	Minimal understanding	Moderate understanding	Just right	Highly recommend	Just right	Very effectively presented
Module 7: Storage, Preservation, and Sharing	Moderate understanding	Strong understanding	Just right	Highly recommend	Just right	Very effectively presented
Module 7: Storage, Preservation, and Sharing	Moderate understanding	Moderate understanding	Just right	Highly recommend	Just right	Mostly effectively presented
Module 7: Storage, Preservation, and Sharing	Moderate understanding	Moderate understanding	Just right	Recommend	Just right	Mostly effectively presented
Module 7: Storage, Preservation, and Sharing	Strong understanding	Moderate understanding	Just right	Recommend	Too short	Mostly effectively presented
Module 7: Storage, Preservation, and Sharing	Moderate understanding	Moderate understanding	Just right	Highly recommend	Just right	Very effectively presented
Module 7: Storage, Preservation, and Sharing	Minimal understanding	Moderate understanding	Just right	Highly recommend	Just right	Mostly effectively presented
Module 7: Storage, Preservation, and Sharing	Minimal understanding	Moderate understanding	Just right	Recommend	Too short	Very effectively presented
Module 7: Storage, Preservation, and Sharing	Minimal understanding	Moderate understanding	Just right	Highly recommend	Just right	Very effectively presented
Module 7: Storage, Preservation, and Sharing	Moderate understanding	Moderate understanding	Just right	Recommend	Just right	Very effectively presented
Module 7: Storage, Preservation, and Sharing	Minimal understanding	Moderate understanding	Just right	Recommend	Just right	Somewhat effectively presented
Module 7: Storage, Preservation, and Sharing	Moderate understanding	Moderate understanding	Just right	Highly recommend	Just right	Mostly effectively presented
Module 7: Storage, Preservation, and Sharing	Strong understanding	Strong understanding	Just right	Recommend	Just right	Mostly effectively presented
Module 7: Storage, Preservation, and Sharing	Minimal understanding	Moderate understanding	Just right	Recommend	Just right	Mostly effectively presented
Module 7: Storage, Preservation, and Sharing	Minimal understanding	Moderate understanding	Just right	Recommend	Just right	Mostly effectively presented
Module 7: Storage, Preservation, and Sharing	Minimal understanding	Strong understanding	Just right	Recommend	Just right	Mostly effectively presented
Module 7: Storage, Preservation, and Sharing	Strong understanding	Strong understanding	Just right	Recommend	Just right	Very effectively presented
Module 7: Storage, Preservation, and Sharing	Moderate understanding	Strong understanding	Just right	Highly recommend	Just right	Very effectively presented
Module 7: Storage, Preservation, and Sharing	Minimal understanding	Moderate understanding	Just right	Recommend	Just right	Mostly effectively presented
Module 7: Storage, Preservation, and Sharing	Minimal understanding	Minimal understanding	Too low	Recommend with reservations	Too long	Somewhat effectively presented
Module 7: Storage, Preservation, and Sharing	Minimal understanding	Minimal understanding	Too low	Recommend with reservations	Too short	Mostly effectively presented
Module 7: Storage, Preservation, and Sharing	Minimal understanding	Moderate understanding	Just right	Recommend with reservations	Just right	Somewhat effectively presented
Module 7: Storage, Preservation, and Sharing	Strong understanding	Strong understanding	Just right	Highly recommend	Just right	Very effectively presented
Module 7: Storage, Preservation, and Sharing	Moderate understanding	Moderate understanding	Just right	Recommend	Just right	Mostly effectively presented
Module 7: Storage, Preservation, and Sharing	Moderate understanding	Strong understanding	Just right	Recommend	Just right	Mostly effectively presented
Module 7: Storage, Preservation, and Sharing	Moderate understanding	Moderate understanding	Just right	Recommend with reservations	Just right	Mostly effectively presented
Module 7: Storage, Preservation, and Sharing	Moderate understanding	Strong understanding	Just right	Highly recommend	Just right	Very effectively presented
