# Supplementary material for: A two-tiered curriculum to improve data management practices for researchers
Source: PLOS journal article supplement (doi:10.1371/journal.pone.0215509), 2019-05-01
Supplement: S6 (10.1371/journal.pone.0215509.s006) [file journal.pone.0215509.s006]

# Research Data Management Class Follow-up Survey

Please complete the survey below.

---

Have you used what you learned in the Perspectives in Research Data Management class in your work to improve your data management practices?

☐ Yes

☐ No

(if yes) Briefly describe:

(if no) Why not?
